# Supplementary material for: Patients’ experiences of life after bariatric surgery and follow-up care: a qualitative study
Source: PubMed Central journal article supplement (PMC7045271; doi:10.1136/bmjopen-2019-035013), 2020-02-06
Supplement: bmjopen-2019-035013supp004.pdf [file bmjopen-2019-035013supp004.pdf]

**Document S4: Final coding structure used in NVivo**

| <b>Name of code</b>                                | <b>Code related to</b> |
|----------------------------------------------------|------------------------|
| General NHS comments not related to surgery        | Aspects of care        |
| Guidelines from health professionals               | Aspects of care        |
| Follow-up care                                     | Aspects of care        |
| Factors leading to decision to have surgery        | Life pre-surgery       |
| Past struggles with weight                         | Life pre-surgery       |
| Pre-op feelings about surgery                      | Life pre-surgery       |
| Expectations of surgery                            | Life pre-surgery       |
| Pre-surgery preparation                            | Life pre-surgery       |
| Liver shrinking pre-op diet                        | Life pre-surgery       |
| Other people's perceptions of obesity              | Life pre-surgery       |
| NHS funding of surgery                             | Life pre-surgery       |
| Criteria to fulfill to obtain surgery              | Life pre-surgery       |
| Background                                         | Life pre-surgery       |
| Choice of operation                                | Life pre-surgery       |
| Social impact of obesity                           | Life pre-surgery       |
| Treatment from health professionals around obesity | Life pre-surgery       |
| Other people's experiences of surgery              | Life post-surgery      |
| Future expectations and hopes                      | Life post-surgery      |
| Peri-operative experience                          | Life post-surgery      |
| Factors that help maintain motivation post-surgery | Life post-surgery      |
| Support groups                                     | Life post-surgery      |
| Outcome - Activity, mobility                       | Life post-surgery      |
| Outcome - Body image                               | Life post-surgery      |
| Outcome - Comorbidity                              | Life post-surgery      |
| Outcome - Eating                                   | Life post-surgery      |
| 6 week post-op diet                                | Life post-surgery      |
| Outcome - GI symptoms                              | Life post-surgery      |
| Bowel movements                                    | Life post-surgery      |
| Wind or gas                                        | Life post-surgery      |
| Dumping or sickness                                | Life post-surgery      |
| Outcome - Hunger                                   | Life post-surgery      |
| Outcome - Psychological                            | Life post-surgery      |
| Outcome - Social impact of surgery                 | Life post-surgery      |
| Family reactions to surgery                        | Life post-surgery      |
| Outcome - Weight                                   | Life post-surgery      |
| In-hospital side-effects of surgery                | Life post-surgery      |
| Post-discharge side-effects of surgery             | Life post-surgery      |
| Most important outcomes of surgery                 | Life post-surgery      |
| Outcome - Normality                                | Life post-surgery      |
| Outcome - Clothing                                 | Life post-surgery      |
| Outcome - increased work options                   | Life post-surgery      |
